# Supplementary material
Source: Springer Nature journal article supplement (https://www.springermedizin.de/resource/supplementary/12913_2010_1323_MOESM1_ESM.pdf/9527874)

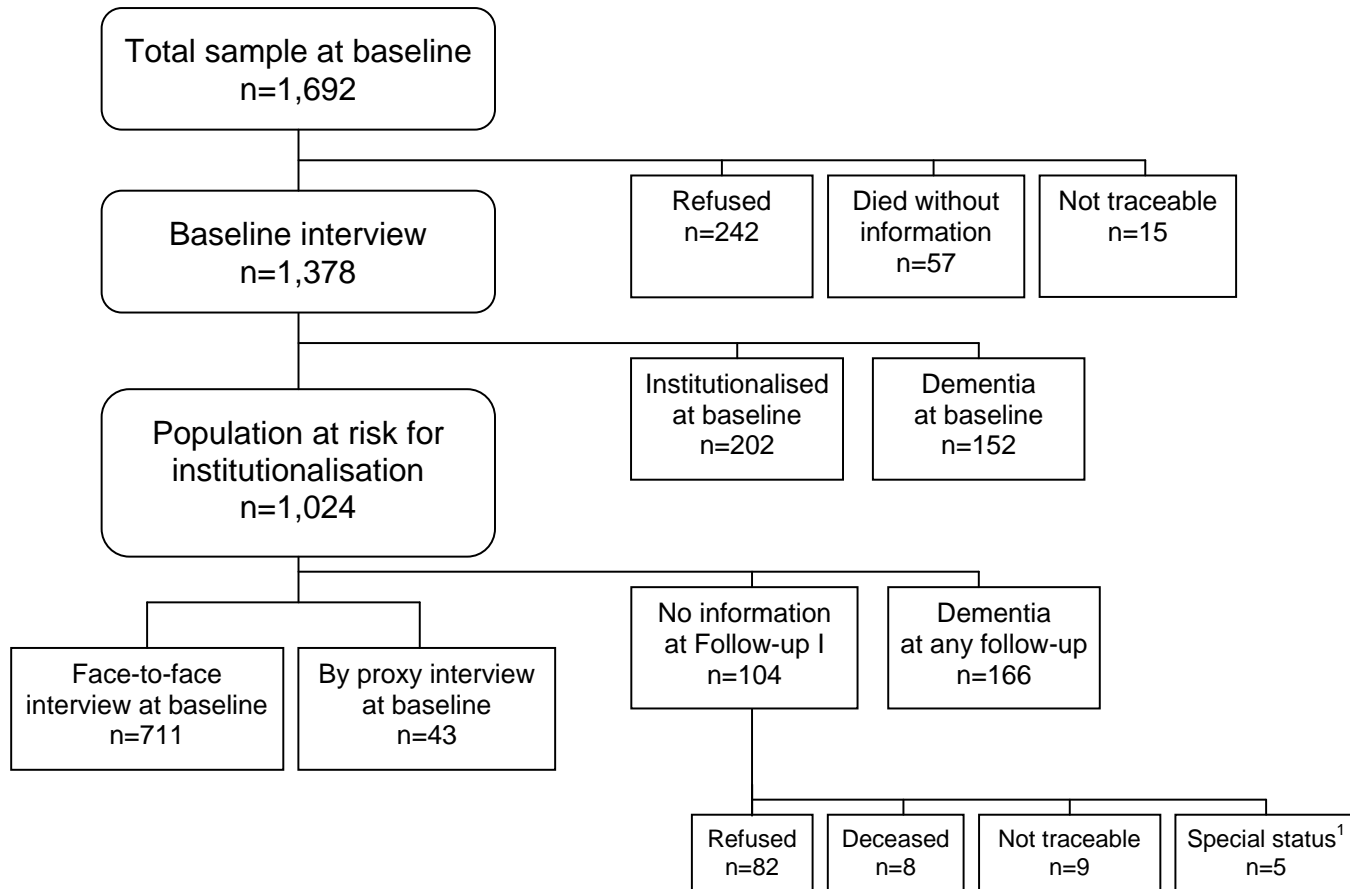

<sup>1</sup> e.g. paranoid, handicapped

Supplement: MOESM1 [file 9527874]
